# Supplementary material for: Integrated Bioinformatics Analysis Identifies Robust Biomarkers and Its Correlation With Immune Microenvironment in Nonalcoholic Fatty Liver Disease
Source: Front Genet. 2022 Jul 14;13:942153. doi: 10.3389/fgene.2022.942153 (PMC9330026; doi:10.3389/fgene.2022.942153)
Supplement: Supplementary file 5 [file DataSheet1.xlsx]

## Sheet: GSE48452
Group	GEO Accession	Organism	Platform ID	Disease state	Tissue
liver, C, A1359-01	GSM1178970	Homo sapiens	GPL11532	group: Control	liver biopsy
liver, C, A1359-02	GSM1178971	Homo sapiens	GPL11532	group: Control	liver biopsy
liver, C, A1359-03	GSM1178972	Homo sapiens	GPL11532	group: Control	liver biopsy
liver, C, A1359-04	GSM1178973	Homo sapiens	GPL11532	group: Control	liver biopsy
liver, C, A1359-05	GSM1178974	Homo sapiens	GPL11532	group: Control	liver biopsy
liver, N, A1359-06	GSM1178975	Homo sapiens	GPL11532	group: Nash	liver biopsy
liver, H, A1359-07	GSM1178976	Homo sapiens	GPL11532	group: Healthy obese	liver biopsy
liver, C, A1359-08	GSM1178977	Homo sapiens	GPL11532	group: Control	liver biopsy
liver, C, A1359-09	GSM1178978	Homo sapiens	GPL11532	group: Control	liver biopsy
liver, C, A1359-10	GSM1178979	Homo sapiens	GPL11532	group: Control	liver biopsy
liver, N, A1359-11	GSM1178980	Homo sapiens	GPL11532	group: Nash	liver biopsy
liver, H, A1359-12	GSM1178981	Homo sapiens	GPL11532	group: Healthy obese	liver biopsy
liver, H, A1359-13	GSM1178982	Homo sapiens	GPL11532	group: Healthy obese	liver biopsy
liver, H, A1359-14	GSM1178983	Homo sapiens	GPL11532	group: Healthy obese	liver biopsy
liver, H, A1359-15	GSM1178984	Homo sapiens	GPL11532	group: Healthy obese	liver biopsy
liver, H, A1359-16	GSM1178985	Homo sapiens	GPL11532	group: Healthy obese	liver biopsy
liver, S, A1359-17	GSM1178986	Homo sapiens	GPL11532	group: Steatosis	liver biopsy
liver, N, A1359-18	GSM1178987	Homo sapiens	GPL11532	group: Nash	liver biopsy
liver, S, A1359-19	GSM1178988	Homo sapiens	GPL11532	group: Steatosis	liver biopsy
liver, S, A1359-20	GSM1178989	Homo sapiens	GPL11532	group: Steatosis	liver biopsy
liver, H, A1359-22	GSM1178990	Homo sapiens	GPL11532	group: Healthy obese	liver biopsy
liver, H, A1359-23	GSM1178991	Homo sapiens	GPL11532	group: Healthy obese	liver biopsy
liver, H, A1359-24	GSM1178992	Homo sapiens	GPL11532	group: Healthy obese	liver biopsy
liver, S, A1649-01	GSM1178993	Homo sapiens	GPL11532	group: Steatosis	liver biopsy
liver, H, A1359-25	GSM1178994	Homo sapiens	GPL11532	group: Healthy obese	liver biopsy
liver, N, A1359-26	GSM1178995	Homo sapiens	GPL11532	group: Nash	liver biopsy
liver, N, A1359-27	GSM1178996	Homo sapiens	GPL11532	group: Nash	liver biopsy
liver, H, A1359-28	GSM1178997	Homo sapiens	GPL11532	group: Healthy obese	liver biopsy
liver, C, A1359-29	GSM1178998	Homo sapiens	GPL11532	group: Control	liver biopsy
liver, S, A1359-30	GSM1178999	Homo sapiens	GPL11532	group: Steatosis	liver biopsy
liver, H, A1359-31	GSM1179000	Homo sapiens	GPL11532	group: Healthy obese	liver biopsy
liver, N, A1359-32	GSM1179001	Homo sapiens	GPL11532	group: Nash	liver biopsy
liver, N, A1359-33	GSM1179002	Homo sapiens	GPL11532	group: Nash	liver biopsy
liver, N, A1359-34	GSM1179003	Homo sapiens	GPL11532	group: Nash	liver biopsy
liver, N, A1359-35	GSM1179004	Homo sapiens	GPL11532	group: Nash	liver biopsy
liver, H, A1359-36	GSM1179005	Homo sapiens	GPL11532	group: Healthy obese	liver biopsy
liver, N, A1359-37	GSM1179006	Homo sapiens	GPL11532	group: Nash	liver biopsy
liver, H, A1359-38	GSM1179007	Homo sapiens	GPL11532	group: Healthy obese	liver biopsy
liver, N, A1359-39	GSM1179008	Homo sapiens	GPL11532	group: Nash	liver biopsy
liver, C, A1649-02	GSM1179009	Homo sapiens	GPL11532	group: Control	liver biopsy
liver, C, A1359-40	GSM1179010	Homo sapiens	GPL11532	group: Control	liver biopsy
liver, S, A1649-03	GSM1179011	Homo sapiens	GPL11532	group: Steatosis	liver biopsy
liver, H, A1359-41	GSM1179012	Homo sapiens	GPL11532	group: Healthy obese	liver biopsy
liver, H, A1359-42	GSM1179013	Homo sapiens	GPL11532	group: Healthy obese	liver biopsy
liver, H, A1359-43	GSM1179014	Homo sapiens	GPL11532	group: Healthy obese	liver biopsy
liver, N, A1359-44	GSM1179015	Homo sapiens	GPL11532	group: Nash	liver biopsy
liver, H, A1359-45	GSM1179016	Homo sapiens	GPL11532	group: Healthy obese	liver biopsy
liver, N, A1359-46	GSM1179017	Homo sapiens	GPL11532	group: Nash	liver biopsy
liver, C, A1359-49	GSM1179018	Homo sapiens	GPL11532	group: Control	liver biopsy
liver, H, A1359-50	GSM1179019	Homo sapiens	GPL11532	group: Healthy obese	liver biopsy
liver, H, A1359-51	GSM1179020	Homo sapiens	GPL11532	group: Healthy obese	liver biopsy
liver, S, A1649-05	GSM1179021	Homo sapiens	GPL11532	group: Steatosis	liver biopsy
liver, H, A1359-52	GSM1179022	Homo sapiens	GPL11532	group: Healthy obese	liver biopsy
liver, S, A1359-53	GSM1179023	Homo sapiens	GPL11532	group: Steatosis	liver biopsy
liver, C, A1359-54	GSM1179024	Homo sapiens	GPL11532	group: Control	liver biopsy
liver, S, A1649-08	GSM1179025	Homo sapiens	GPL11532	group: Steatosis	liver biopsy
liver, N, A1359-55	GSM1179026	Homo sapiens	GPL11532	group: Nash	liver biopsy
liver, S, A1649-06	GSM1179027	Homo sapiens	GPL11532	group: Steatosis	liver biopsy
liver, H, A1649-09	GSM1179028	Homo sapiens	GPL11532	group: Healthy obese	liver biopsy
liver, S, A1359-56	GSM1179029	Homo sapiens	GPL11532	group: Steatosis	liver biopsy
liver, H, A1359-57	GSM1179030	Homo sapiens	GPL11532	group: Healthy obese	liver biopsy
liver, C, A1649-10	GSM1179031	Homo sapiens	GPL11532	group: Control	liver biopsy
liver, H, A1359-58	GSM1179032	Homo sapiens	GPL11532	group: Healthy obese	liver biopsy
liver, N, A1359-59	GSM1179033	Homo sapiens	GPL11532	group: Nash	liver biopsy
liver, S, A1359-60	GSM1179034	Homo sapiens	GPL11532	group: Steatosis	liver biopsy
liver, N, A1359-61	GSM1179035	Homo sapiens	GPL11532	group: Nash	liver biopsy
liver, N, A1359-62	GSM1179036	Homo sapiens	GPL11532	group: Nash	liver biopsy
liver, S, A1359-63	GSM1179037	Homo sapiens	GPL11532	group: Steatosis	liver biopsy
liver, H, A1359-64	GSM1179038	Homo sapiens	GPL11532	group: Healthy obese	liver biopsy
liver, N, A1649-11	GSM1179039	Homo sapiens	GPL11532	group: Nash	liver biopsy
liver, S, A1649-12	GSM1179040	Homo sapiens	GPL11532	group: Steatosis	liver biopsy
liver, H, A1649-13	GSM1179041	Homo sapiens	GPL11532	group: Healthy obese	liver biopsy
liver, H, A1649-14	GSM1179042	Homo sapiens	GPL11532	group: Healthy obese	liver biopsy

## Sheet: GSE63067
Group	GEO Accession	Organism	Platform ID	Disease state	Tissue
Steatosis, biological replicate 1	GSM1539877	Homo sapiens	GPL570	disease status: steatosis	liver
Steatosis, biological replicate 2	GSM1539878	Homo sapiens	GPL570	disease status: steatosis	liver
Non-alcoholic steatohepatitis, biological replicate 1	GSM1539879	Homo sapiens	GPL570	disease status: non-alcoholic steatohepatitis	liver
Non-alcoholic steatohepatitis, biological replicate 2	GSM1539880	Homo sapiens	GPL570	disease status: non-alcoholic steatohepatitis	liver
Non-alcoholic steatohepatitis, biological replicate 3	GSM1539881	Homo sapiens	GPL570	disease status: non-alcoholic steatohepatitis	liver
Non-alcoholic steatohepatitis, biological replicate 4	GSM1539882	Homo sapiens	GPL570	disease status: non-alcoholic steatohepatitis	liver
Non-alcoholic steatohepatitis, biological replicate 5	GSM1539883	Homo sapiens	GPL570	disease status: non-alcoholic steatohepatitis	liver
Non-alcoholic steatohepatitis, biological replicate 6	GSM1539884	Homo sapiens	GPL570	disease status: non-alcoholic steatohepatitis	liver
Non-alcoholic steatohepatitis, biological replicate 7	GSM1539885	Homo sapiens	GPL570	disease status: non-alcoholic steatohepatitis	liver
Non-alcoholic steatohepatitis, biological replicate 8	GSM1539886	Homo sapiens	GPL570	disease status: non-alcoholic steatohepatitis	liver
Non-alcoholic steatohepatitis, biological replicate 9	GSM1539887	Homo sapiens	GPL570	disease status: non-alcoholic steatohepatitis	liver
Healthy, biological replicate 1	GSM1539888	Homo sapiens	GPL570	disease status: healthy	liver
Healthy, biological replicate 2	GSM1539889	Homo sapiens	GPL570	disease status: healthy	liver
Healthy, biological replicate 3	GSM1539890	Homo sapiens	GPL570	disease status: healthy	liver
Healthy, biological replicate 4	GSM1539891	Homo sapiens	GPL570	disease status: healthy	liver
Healthy, biological replicate 5	GSM1539892	Homo sapiens	GPL570	disease status: healthy	liver
Healthy, biological replicate 6	GSM1539893	Homo sapiens	GPL570	disease status: healthy	liver
Healthy, biological replicate 7	GSM1539894	Homo sapiens	GPL570	disease status: healthy	liver

## Sheet: GSE66676
Group	GEO Accession	Organism	Platform ID	Disease state	Tissue
No NAFLD Rep1	GSM1627740	Homo sapiens	GPL6244	No NAFLD	Liver wedge biopsy
No NAFLD Rep2	GSM1627741	Homo sapiens	GPL6244	No NAFLD	Liver wedge biopsy
No NAFLD Rep3	GSM1627742	Homo sapiens	GPL6244	No NAFLD	Liver wedge biopsy
No NAFLD Rep4	GSM1627743	Homo sapiens	GPL6244	No NAFLD	Liver wedge biopsy
No NAFLD Rep5	GSM1627744	Homo sapiens	GPL6244	No NAFLD	Liver wedge biopsy
No NAFLD Rep6	GSM1627745	Homo sapiens	GPL6244	No NAFLD	Liver wedge biopsy
No NAFLD Rep7	GSM1627746	Homo sapiens	GPL6244	No NAFLD	Liver wedge biopsy
No NAFLD Rep8	GSM1627747	Homo sapiens	GPL6244	No NAFLD	Liver wedge biopsy
No NAFLD Rep9	GSM1627748	Homo sapiens	GPL6244	No NAFLD	Liver wedge biopsy
No NAFLD Rep10	GSM1627749	Homo sapiens	GPL6244	No NAFLD	Liver wedge biopsy
No NAFLD Rep11	GSM1627750	Homo sapiens	GPL6244	No NAFLD	Liver wedge biopsy
No NAFLD Rep12	GSM1627751	Homo sapiens	GPL6244	No NAFLD	Liver wedge biopsy
No NAFLD Rep13	GSM1627752	Homo sapiens	GPL6244	No NAFLD	Liver wedge biopsy
No NAFLD Rep14	GSM1627753	Homo sapiens	GPL6244	No NAFLD	Liver wedge biopsy
No NAFLD Rep15	GSM1627754	Homo sapiens	GPL6244	No NAFLD	Liver wedge biopsy
No NAFLD Rep16	GSM1627755	Homo sapiens	GPL6244	No NAFLD	Liver wedge biopsy
No NAFLD Rep17	GSM1627756	Homo sapiens	GPL6244	No NAFLD	Liver wedge biopsy
No NAFLD Rep18	GSM1627757	Homo sapiens	GPL6244	No NAFLD	Liver wedge biopsy
No NAFLD Rep19	GSM1627758	Homo sapiens	GPL6244	No NAFLD	Liver wedge biopsy
No NAFLD Rep20	GSM1627759	Homo sapiens	GPL6244	No NAFLD	Liver wedge biopsy
No NAFLD Rep21	GSM1627760	Homo sapiens	GPL6244	No NAFLD	Liver wedge biopsy
No NAFLD Rep22	GSM1627761	Homo sapiens	GPL6244	No NAFLD	Liver wedge biopsy
No NAFLD Rep23	GSM1627762	Homo sapiens	GPL6244	No NAFLD	Liver wedge biopsy
No NAFLD Rep24	GSM1627763	Homo sapiens	GPL6244	No NAFLD	Liver wedge biopsy
No NAFLD Rep25	GSM1627764	Homo sapiens	GPL6244	No NAFLD	Liver wedge biopsy
No NAFLD Rep26	GSM1627765	Homo sapiens	GPL6244	No NAFLD	Liver wedge biopsy
No NAFLD Rep27	GSM1627766	Homo sapiens	GPL6244	No NAFLD	Liver wedge biopsy
No NAFLD Rep28	GSM1627767	Homo sapiens	GPL6244	No NAFLD	Liver wedge biopsy
No NAFLD Rep29	GSM1627768	Homo sapiens	GPL6244	No NAFLD	Liver wedge biopsy
No NAFLD Rep30	GSM1627769	Homo sapiens	GPL6244	No NAFLD	Liver wedge biopsy
No NAFLD Rep31	GSM1627770	Homo sapiens	GPL6244	No NAFLD	Liver wedge biopsy
No NAFLD Rep32	GSM1627771	Homo sapiens	GPL6244	No NAFLD	Liver wedge biopsy
No NAFLD Rep33	GSM1627772	Homo sapiens	GPL6244	No NAFLD	Liver wedge biopsy
No NAFLD Rep34	GSM1627773	Homo sapiens	GPL6244	No NAFLD	Liver wedge biopsy
NAFLD not NASH Rep1	GSM1627774	Homo sapiens	GPL6244	NAFLD not NASH	Liver wedge biopsy
NAFLD not NASH Rep2	GSM1627775	Homo sapiens	GPL6244	NAFLD not NASH	Liver wedge biopsy
NAFLD not NASH Rep3	GSM1627776	Homo sapiens	GPL6244	NAFLD not NASH	Liver wedge biopsy
NAFLD not NASH Rep4	GSM1627777	Homo sapiens	GPL6244	NAFLD not NASH	Liver wedge biopsy
NAFLD not NASH Rep5	GSM1627778	Homo sapiens	GPL6244	NAFLD not NASH	Liver wedge biopsy
NAFLD not NASH Rep6	GSM1627779	Homo sapiens	GPL6244	NAFLD not NASH	Liver wedge biopsy
NAFLD not NASH Rep7	GSM1627780	Homo sapiens	GPL6244	NAFLD not NASH	Liver wedge biopsy
NAFLD not NASH Rep8	GSM1627781	Homo sapiens	GPL6244	NAFLD not NASH	Liver wedge biopsy
NAFLD not NASH Rep9	GSM1627782	Homo sapiens	GPL6244	NAFLD not NASH	Liver wedge biopsy
NAFLD not NASH Rep10	GSM1627783	Homo sapiens	GPL6244	NAFLD not NASH	Liver wedge biopsy
NAFLD not NASH Rep11	GSM1627784	Homo sapiens	GPL6244	NAFLD not NASH	Liver wedge biopsy
NAFLD not NASH Rep12	GSM1627785	Homo sapiens	GPL6244	NAFLD not NASH	Liver wedge biopsy
NAFLD not NASH Rep13	GSM1627786	Homo sapiens	GPL6244	NAFLD not NASH	Liver wedge biopsy
NAFLD not NASH Rep14	GSM1627787	Homo sapiens	GPL6244	NAFLD not NASH	Liver wedge biopsy
NAFLD not NASH Rep15	GSM1627788	Homo sapiens	GPL6244	NAFLD not NASH	Liver wedge biopsy
NAFLD not NASH Rep16	GSM1627789	Homo sapiens	GPL6244	NAFLD not NASH	Liver wedge biopsy
NAFLD not NASH Rep17	GSM1627790	Homo sapiens	GPL6244	NAFLD not NASH	Liver wedge biopsy
NAFLD not NASH Rep18	GSM1627791	Homo sapiens	GPL6244	NAFLD not NASH	Liver wedge biopsy
NAFLD not NASH Rep19	GSM1627792	Homo sapiens	GPL6244	NAFLD not NASH	Liver wedge biopsy
NAFLD not NASH Rep20	GSM1627793	Homo sapiens	GPL6244	NAFLD not NASH	Liver wedge biopsy
NAFLD not NASH Rep21	GSM1627794	Homo sapiens	GPL6244	NAFLD not NASH	Liver wedge biopsy
NAFLD not NASH Rep22	GSM1627795	Homo sapiens	GPL6244	NAFLD not NASH	Liver wedge biopsy
NAFLD not NASH Rep23	GSM1627796	Homo sapiens	GPL6244	NAFLD not NASH	Liver wedge biopsy
NAFLD not NASH Rep24	GSM1627797	Homo sapiens	GPL6244	NAFLD not NASH	Liver wedge biopsy
NAFLD not NASH Rep25	GSM1627798	Homo sapiens	GPL6244	NAFLD not NASH	Liver wedge biopsy
NAFLD not NASH Rep26	GSM1627799	Homo sapiens	GPL6244	NAFLD not NASH	Liver wedge biopsy
Borderline NASH Rep1	GSM1627800	Homo sapiens	GPL6244	Borderline NASH	Liver wedge biopsy
Borderline NASH Rep2	GSM1627801	Homo sapiens	GPL6244	Borderline NASH	Liver wedge biopsy
Borderline NASH Rep3	GSM1627802	Homo sapiens	GPL6244	Borderline NASH	Liver wedge biopsy
Borderline NASH Rep4	GSM1627803	Homo sapiens	GPL6244	Borderline NASH	Liver wedge biopsy
Borderline NASH Rep5	GSM1627804	Homo sapiens	GPL6244	Borderline NASH	Liver wedge biopsy
Definite NASH Rep1	GSM1627805	Homo sapiens	GPL6244	Definite NASH	Liver wedge biopsy
Definite NASH Rep2	GSM1627806	Homo sapiens	GPL6244	Definite NASH	Liver wedge biopsy
